# Supplementary material
Source: PubMed Central journal article supplement (PMC3000517)
Supplement: mmc1.pdf [file mmc1.pdf]

Supporting Material

Title: Interaction of Salicylate and a Terpenoid Plant Extract with Model

Authors: Himanshu Khandelia, Sarah Witzke, and Ole G. Mouritsen

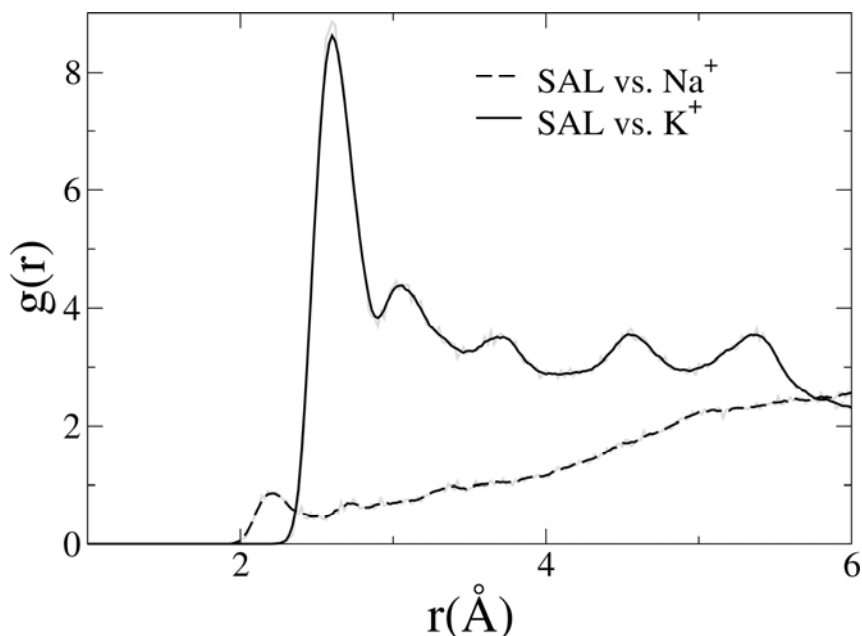

**Figure S1:** Radial pair correlation functions between cations and the SAL carboxyl group from the K20 and Na20 simulations. A 5-point average was taken over the original data (shown in light gray).  $K^+$  ions are attracted to the interface after SAL binds to the lipid headgroups near the choline region.  $Na^+$  ions, on the other hand, bind to the glycerol region, and cannot form ion-pairs with SAL.

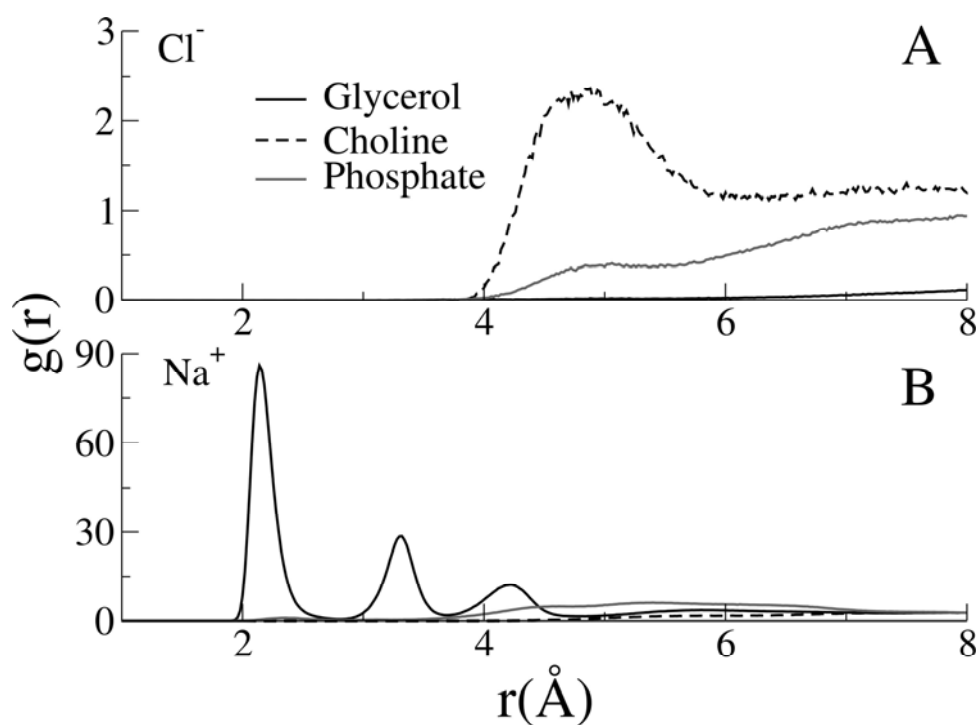

**Figure S2:** Radial distribution functions between the cations and various parts of the lipid headgroups. (A) Chloride ions do not interact specifically with any lipid part. (B)  $\text{Na}^+$  ions bind deep into the headgroup region and interact with the glycerol backbone, and not the phosphate groups.
